# Supplementary material
Source: publisher figshare collection journal article supplement (https://acs.figshare.com/ndownloader/files/4720675)
Supplement: Supplementary file 1 [file 4720675]

data_CRYSTALS_cif 
_audit_creation_date        06-10-25
_audit_creation_method CRYSTALS_ver_12.84

_oxford_structure_analysis_title  'eb6142'
_chemical_name_systematic         ?
_chemical_melting_point           ?

_cell_length_a                    12.9120(2)
_cell_length_b                    23.5530(4)
_cell_length_c                    15.1900(3)
_cell_angle_alpha                 90
_cell_angle_beta                  107.5490(10)
_cell_angle_gamma                 90
_cell_volume                      4404.53(14)
 
_symmetry_cell_setting            'Monoclinic' 
_symmetry_space_group_name_H-M    'P 1 21/n 1 ' 
_symmetry_space_group_name_Hall   '?' 
loop_
 _symmetry_equiv_pos_as_xyz
 'x,y,z'
 '-x,-y,-z'
 '-x+1/2,y+1/2,-z+1/2'
 'x+1/2,-y+1/2,z+1/2'

loop_
_atom_type_symbol
_atom_type_scat_dispersion_real
_atom_type_scat_dispersion_imag
_atom_type_scat_Cromer_Mann_a1
_atom_type_scat_Cromer_Mann_b1
_atom_type_scat_Cromer_Mann_a2
_atom_type_scat_Cromer_Mann_b2
_atom_type_scat_Cromer_Mann_a3
_atom_type_scat_Cromer_Mann_b3
_atom_type_scat_Cromer_Mann_a4
_atom_type_scat_Cromer_Mann_b4
_atom_type_scat_Cromer_Mann_c
_atom_type_scat_source  
 C       0.0033   0.0016   2.3100  20.8439   1.0200  10.2075   1.5886   0.5687
   0.8650  51.6512   0.2156 'International Tables Vol C 4.2.6.8 and 6.1.1.4'
 H       0.0000   0.0000   0.4930  10.5109   0.3229  26.1257   0.1402   3.1424
   0.0408  57.7998   0.0030 'International Tables Vol C 4.2.6.8 and 6.1.1.4'
 N       0.0061   0.0033  12.2126   0.0057   3.1322   9.8933   2.0125  28.9975
   1.1663   0.5826 -11.5290 'International Tables Vol C 4.2.6.8 and 6.1.1.4'
 O       0.0106   0.0060   3.0485  13.2771   2.2868   5.7011   1.5463   0.3239
   0.8670  32.9089   0.2508 'International Tables Vol C 4.2.6.8 and 6.1.1.4'
 Mn      0.3368   0.7283  11.2819   5.3409   7.3573   0.3432   3.0193  17.8674
   2.2441  83.7543   1.0896 'International Tables Vol C 4.2.6.8 and 6.1.1.4'
 
 
_cell_formula_units_Z                    4

# Given Formula = C42 H51 Mn3 N3 O12 
# Dc =      1.44 Fooo =   1992.00 Mu =      9.10 M =    954.66
# Found Formula = C42 H54 Mn3 N3 O12 
# Dc =      1.44 FOOO =   1992.00 Mu =      9.10 M =    957.69

_chemical_formula_sum             'C42 H54 Mn3 N3 O12'
_chemical_formula_moiety          'C42 H54 Mn3 N3 O12'
_chemical_compound_source                ?
_chemical_formula_weight            957.69
 
 
_cell_measurement_reflns_used         7992
_cell_measurement_theta_min              4
_cell_measurement_theta_max             50
_cell_measurement_temperature          150
 
_exptl_crystal_description        'block' 
_exptl_crystal_colour             'black' 
_exptl_crystal_size_min           0.25 
_exptl_crystal_size_mid           0.39 
_exptl_crystal_size_max           0.41 
 
_exptl_crystal_density_diffrn     1.444 
_exptl_crystal_density_meas       ? 
# Non-dispersive F(000): 
_exptl_crystal_F_000              1992 
_exptl_absorpt_coefficient_mu     0.910 
 
# Sheldrick geometric approximatio 0.70 0.80 
_exptl_absorpt_correction_type    multi-scan 
_exptl_absorpt_process_details    'SADABS (Siemens, 1996)' 
_exptl_absorpt_correction_T_min   0.53 
_exptl_absorpt_correction_T_max   0.80 
_diffrn_measurement_device_type   'Bruker SMART' 
_diffrn_radiation_monochromator   'graphite' 
_diffrn_radiation_type            'Mo K\a'
_diffrn_radiation_wavelength           0.71073
_diffrn_measurement_method        '\f & \w scans' 
 
# If a reference occurs more than once, delete the author 
# and date from subsequent references. 
_computing_data_collection        'SMART (Siemens, 1993)' 
_computing_cell_refinement        'SAINT (Siemens ,1995)' 
_computing_data_reduction         'SAINT (Siemens ,1995)' 
_computing_structure_solution     'SIR92 (Altomare et al., 1994)' 
_computing_structure_refinement   'CRYSTALS (Betteridge et al., 2003)' 
_computing_publication_material   'CRYSTALS (Betteridge et al., 2003)' 
_computing_molecular_graphics     'CAMERON (Watkin et al., 1996)' 
 
_diffrn_standards_interval_time   ? 
_diffrn_standards_interval_count  ? 
_diffrn_standards_number          0 
_diffrn_standards_decay_%         ? 
 
_diffrn_ambient_temperature        150
_diffrn_reflns_number             65857 
_reflns_number_total              11723 
_diffrn_reflns_av_R_equivalents   0.069 
# Number of reflections with Friedels Law is 11723 
# Number of reflections without Friedels Law is 0 
# Theoretical number of reflections is about 12610 
 
 
_diffrn_reflns_theta_min          1.651 
_diffrn_reflns_theta_max          29.795 
_diffrn_measured_fraction_theta_max 0.930 
 
_diffrn_reflns_theta_full         28.008 
_diffrn_measured_fraction_theta_full 0.998 
 
 
_diffrn_reflns_limit_h_min        -17 
_diffrn_reflns_limit_h_max        17 
_diffrn_reflns_limit_k_min        -32 
_diffrn_reflns_limit_k_max        32 
_diffrn_reflns_limit_l_min        -20 
_diffrn_reflns_limit_l_max        19 
_reflns_limit_h_min               -17 
_reflns_limit_h_max               17 
_reflns_limit_k_min               0 
_reflns_limit_k_max               32 
_reflns_limit_l_min               0 
_reflns_limit_l_max               20 
 
_oxford_diffrn_Wilson_B_factor    0.00 
_oxford_diffrn_Wilson_scale       0.00 
 
_atom_sites_solution_primary      direct #heavy,direct,difmap,geom
# _atom_sites_solution_secondary  difmap
_atom_sites_solution_hydrogens    geom
 
_refine_diff_density_min          -1.38 
_refine_diff_density_max          1.56 
 
 
_refine_ls_number_reflns          11723 
_refine_ls_number_restraints      3 
_refine_ls_number_parameters      550 
 
#_refine_ls_R_factor_ref 0.0927 
_refine_ls_wR_factor_ref          0.1555 
_refine_ls_goodness_of_fit_ref    1.0083 
 
#_reflns_number_all 11723 
_refine_ls_R_factor_all           0.0927 
_refine_ls_wR_factor_all          0.1555 
 
# No actual I/u(I) cutoff was used for refinement. The
# threshold below is used for "_gt" information ONLY:
_reflns_threshold_expression      I>2.0\s(I)
_reflns_number_gt                 6207 
_refine_ls_R_factor_gt            0.0437 
_refine_ls_wR_factor_gt           0.1055 
 
_refine_ls_shift/su_max           0.007955 
 
# choose from: rm (reference molecule of known chirality), 
# ad (anomolous dispersion - Flack), rmad (rm and ad), 
# syn (from synthesis), unk (unknown) or . (not applicable). 
_chemical_absolute_configuration  '.' 
 
 
_refine_ls_structure_factor_coef  Fsqd 
_refine_ls_matrix_type            full
_refine_ls_hydrogen_treatment     mixed          # none, undef, noref, refall,
                                                 # refxyz, refU, constr or mixed
_refine_ls_weighting_scheme       calc 
_refine_ls_weighting_details 
;
 Method, part 1, Chebychev polynomial, (Watkin, 1994, Prince, 1982) 
 [weight] = 1.0/[A~0~*T~0~(x)+A~1~*T~1~(x) ... +A~n-1~]*T~n-1~(x)] 
 where A~i~ are the Chebychev coefficients listed below and x= Fcalc/Fmax 
 Method = Robust Weighting (Prince, 1982) 
 W = [weight] * [1-(deltaF/6*sigmaF)^2^]^2^ 
 A~i~ are: 
 59.0 94.5 57.6 25.3 5.54 
;
 
 
 
_publ_contact_author_name         'Stephen A. Moggach' 
_publ_requested_coeditor_name     'S.Moggach@ed.ac.uk' 
 
_publ_section_exptl_refinement 
;H atoms placed geometrically after each cycle 
; 
 
# Insert your own references if required - in alphabetical order 
_publ_section_references 
; 
Altomare, A., Cascarano, G., Giacovazzo, G., Guagliardi, A., Burla, M.C., 
Polidori, G. & Camalli, M. (1994). J. Appl. Cryst. 27, 435. 
 
Betteridge, P.W., Carruthers, J.R., Cooper, R.I., 
Prout, K. & Watkin, D.J. (2003). J. Appl. Cryst. 36, 1487. 
 
Larson, A.C. (1970) Crystallographic Computing, Ed Ahmed, F.R., 
Munksgaard, Copenhagen, 291-294. 
 
Prince, E. 
Mathematical Techniques in Crystallography 
and Materials Science 
Springer-Verlag, New York, 1982. 
 
Siemens Industrial Automation, Inc (1993). 
SMART: Area-Detector Software Package; Madison, WI. 
 
Siemens Industrial Automation, Inc (1995). 
SAINT: Area-Detector Integration Software.; Madison, WI. 
 
Siemens Industrial Automation, Inc (1996). 
SADABS: Area-Detector Absorption Correction;: Madison, WI. 
 
Watkin D.J. (1994). 
Acta Cryst, A50, 411-437. 
 
Watkin, D.J., Prout, C.K. & Pearce, L.J. (1996). CAMERON, Chemical 
Crystallography Laboratory, Oxford, UK. 
; 

# Uequiv = arithmetic mean of Ui i.e. Ueqiv = (U1+U2+U3)/3

# Replace last . with number of unfound hydrogen atomsattached to an atom.

# ..._refinement_flags_... 
# . no refinement constraints           S special position constraint on site
# G rigid group refinement of site      R riding atom
# D distance or angle restraint on site T thermal displacement constraints
# U Uiso or Uij restraint (rigid bond)  P partial occupancy constraint


loop_
_atom_site_label
_atom_site_type_symbol
_atom_site_fract_x
_atom_site_fract_y
_atom_site_fract_z
_atom_site_U_iso_or_equiv
_atom_site_occupancy
_atom_site_adp_type
_atom_site_refinement_flags_posn
_atom_site_refinement_flags_adp
_atom_site_refinement_flags_occupancy
_atom_site_disorder_assembly
_atom_site_disorder_group
_atom_site_attached_hydrogens
Mn1 Mn -0.08210(4) 0.12221(2) 0.13911(4) 0.0180 1.0000 Uani . . . . . . 
Mn2 Mn 0.12537(4) 0.11493(2) 0.06071(4) 0.0172 1.0000 Uani . . . . . . 
Mn3 Mn 0.01588(4) -0.00183(2) 0.11037(4) 0.0159 1.0000 Uani . . . . . . 
O1 O -0.1839(2) 0.16818(12) 0.1692(2) 0.0276 1.0000 Uani . . . . . . 
O2 O 0.2323(2) 0.14686(12) 0.01629(19) 0.0221 1.0000 Uani . . . . . . 
O3 O -0.0168(2) -0.08158(11) 0.09460(18) 0.0196 1.0000 Uani . . . . . . 
O11 O 0.0118(3) 0.11594(14) 0.2889(2) 0.0308 1.0000 Uani D . . . . . 
O12 O -0.1667(2) 0.13633(12) -0.0183(2) 0.0274 1.0000 Uani D . . . . . 
O21 O 0.2324(2) 0.12598(12) 0.20247(19) 0.0252 1.0000 Uani D . . . . . 
O30 O 0.1326(2) -0.01962(12) 0.24007(19) 0.0246 1.0000 Uani . . . . . . 
O31 O 0.1978(3) 0.05721(12) 0.3258(2) 0.0287 1.0000 Uani . . . . . . 
O123 O 0.0219(2) 0.07774(10) 0.10549(19) 0.0181 1.0000 Uani . . . . . . 
O162 O 0.0573(2) 0.18732(11) 0.06088(19) 0.0219 1.0000 Uani . . . . . . 
O263 O 0.1197(2) -0.00656(11) 0.04024(17) 0.0177 1.0000 Uani . . . . . . 
O361 O -0.1644(2) 0.05575(11) 0.1471(2) 0.0217 1.0000 Uani . . . . . . 
C3 C 0.1855(3) 0.00427(17) 0.3136(3) 0.0234 1.0000 Uani . . . . . . 
C4 C 0.2392(3) -0.03302(16) 0.3955(3) 0.0233 1.0000 Uani . . . . . . 
C5 C 0.3156(4) -0.00981(19) 0.4719(3) 0.0343 1.0000 Uani . . . . . . 
C6 C 0.3657(4) -0.0433(2) 0.5487(3) 0.0405 1.0000 Uani . . . . . . 
C7 C 0.3356(4) -0.1000(2) 0.5471(3) 0.0377 1.0000 Uani . . . . . . 
C8 C 0.2594(4) -0.12422(19) 0.4715(3) 0.0305 1.0000 Uani . . . . . . 
C9 C 0.2122(3) -0.09011(17) 0.3951(3) 0.0254 1.0000 Uani . . . . . . 
C10 C -0.1552(3) 0.21365(17) 0.2243(3) 0.0241 1.0000 Uani . . . . . . 
C11 C -0.2190(4) 0.22702(19) 0.2812(3) 0.0301 1.0000 Uani . . . . . . 
C12 C -0.1943(4) 0.2731(2) 0.3399(3) 0.0353 1.0000 Uani . . . . . . 
C13 C -0.1041(5) 0.3059(2) 0.3439(3) 0.0411 1.0000 Uani . . . . . . 
C14 C -0.0434(4) 0.2950(2) 0.2859(3) 0.0349 1.0000 Uani . . . . . . 
C15 C -0.0672(3) 0.24905(16) 0.2235(3) 0.0243 1.0000 Uani . . . . . . 
C16 C -0.0014(3) 0.24146(17) 0.1611(3) 0.0246 1.0000 Uani . . . . . . 
C17 C 0.0597(4) 0.29072(19) 0.1387(4) 0.0383 1.0000 Uani . . . . . . 
C18 C -0.0159(6) 0.3375(2) 0.0874(5) 0.0608 1.0000 Uani . . . . . . 
C20 C 0.3362(3) 0.13201(16) 0.0532(3) 0.0213 1.0000 Uani . . . . . . 
C21 C 0.4153(3) 0.17467(17) 0.0679(3) 0.0245 1.0000 Uani . . . . . . 
C22 C 0.5242(3) 0.16246(18) 0.1019(3) 0.0275 1.0000 Uani . . . . . . 
C23 C 0.5591(3) 0.10679(19) 0.1232(3) 0.0297 1.0000 Uani . . . . . . 
C24 C 0.4822(3) 0.06438(17) 0.1099(3) 0.0276 1.0000 Uani . . . . . . 
C25 C 0.3699(3) 0.07526(16) 0.0755(3) 0.0208 1.0000 Uani . . . . . . 
C26 C 0.2931(3) 0.02763(16) 0.0637(3) 0.0204 1.0000 Uani . . . . . . 
C27 C 0.3313(3) -0.03261(16) 0.0638(3) 0.0227 1.0000 Uani . . . . . . 
C28 C 0.3528(4) -0.05932(19) 0.1594(3) 0.0333 1.0000 Uani . . . . . . 
C30 C -0.0336(3) -0.11140(15) 0.1651(3) 0.0196 1.0000 Uani . . . . . . 
C31 C 0.0008(4) -0.16818(17) 0.1768(3) 0.0265 1.0000 Uani . . . . . . 
C32 C -0.0104(4) -0.20042(17) 0.2492(3) 0.0297 1.0000 Uani . . . . . . 
C33 C -0.0572(4) -0.17702(18) 0.3120(3) 0.0311 1.0000 Uani . . . . . . 
C34 C -0.0958(4) -0.12231(19) 0.2991(3) 0.0311 1.0000 Uani . . . . . . 
C35 C -0.0864(3) -0.08821(16) 0.2258(3) 0.0225 1.0000 Uani . . . . . . 
C36 C -0.1385(3) -0.03239(17) 0.2114(3) 0.0253 1.0000 Uani . . . . . . 
C37 C -0.2341(4) -0.0211(2) 0.2468(4) 0.0421 1.0000 Uani . . . . . . 
C38 C -0.3295(5) -0.0538(3) 0.1941(6) 0.0730 1.0000 Uani . . . . . . 
C60 C 0.4527(6) -0.0190(3) 0.6296(4) 0.0601 1.0000 Uani . . . . . . 
C80 C 0.2273(4) -0.1854(2) 0.4729(4) 0.0385 1.0000 Uani . . . . . . 
C110 C -0.0365(6) 0.1038(3) 0.3600(4) 0.0532 1.0000 Uani . . . . . . 
C111 C 0.0199(10) 0.1258(9) 0.4447(7) 0.1964 1.0000 Uani . . . . . . 
C120 C -0.2029(4) 0.1894(2) -0.0652(4) 0.0435 1.0000 Uani . . . . . . 
C121 C -0.2913(5) 0.2163(3) -0.0333(4) 0.0523 1.0000 Uani . . . . . . 
C210 C 0.2785(4) 0.17660(18) 0.2502(3) 0.0296 1.0000 Uani . . . . . . 
C211 C 0.3903(4) 0.1651(2) 0.3146(3) 0.0434 1.0000 Uani . . . . . . 
N16 N 0.0008(3) 0.19164(13) 0.1244(2) 0.0195 1.0000 Uani . . . . . . 
N26 N 0.1923(2) 0.03876(13) 0.0565(2) 0.0178 1.0000 Uani . . . . . . 
N36 N -0.1063(2) 0.00633(13) 0.1653(2) 0.0187 1.0000 Uani . . . . . . 
H11 H 0.074(3) 0.097(2) 0.301(4) 0.0500 1.0000 Uiso D . . . . . 
H12 H -0.127(4) 0.118(2) -0.047(4) 0.0500 1.0000 Uiso D . . . . . 
H21 H 0.219(4) 0.1014(16) 0.242(3) 0.0303 1.0000 Uiso D . . . . . 
H51 H 0.3346 0.0294 0.4714 0.0386 1.0000 Uiso . . . . . . 
H71 H 0.3688 -0.1232 0.6006 0.0439 1.0000 Uiso . . . . . . 
H91 H 0.1601 -0.1060 0.3423 0.0316 1.0000 Uiso . . . . . . 
H111 H -0.2807 0.2038 0.2795 0.0396 1.0000 Uiso . . . . . . 
H121 H -0.2401 0.2823 0.3772 0.0448 1.0000 Uiso . . . . . . 
H131 H -0.0845 0.3366 0.3880 0.0515 1.0000 Uiso . . . . . . 
H141 H 0.0173 0.3193 0.2875 0.0441 1.0000 Uiso . . . . . . 
H171 H 0.1091 0.3064 0.1978 0.0533 1.0000 Uiso . . . . . . 
H172 H 0.1052 0.2773 0.1005 0.0533 1.0000 Uiso . . . . . . 
H181 H 0.0269 0.3694 0.0743 0.0801 1.0000 Uiso . . . . . . 
H182 H -0.0599 0.3517 0.1255 0.0801 1.0000 Uiso . . . . . . 
H183 H -0.0638 0.3228 0.0291 0.0801 1.0000 Uiso . . . . . . 
H211 H 0.3924 0.2136 0.0539 0.0325 1.0000 Uiso . . . . . . 
H221 H 0.5771 0.1926 0.1114 0.0334 1.0000 Uiso . . . . . . 
H231 H 0.6350 0.0981 0.1461 0.0370 1.0000 Uiso . . . . . . 
H241 H 0.5062 0.0261 0.1245 0.0339 1.0000 Uiso . . . . . . 
H271 H 0.3997 -0.0333 0.0457 0.0285 1.0000 Uiso . . . . . . 
H272 H 0.2753 -0.0551 0.0177 0.0285 1.0000 Uiso . . . . . . 
H281 H 0.3779 -0.0983 0.1598 0.0395 1.0000 Uiso . . . . . . 
H282 H 0.4089 -0.0369 0.2053 0.0395 1.0000 Uiso . . . . . . 
H283 H 0.2857 -0.0585 0.1776 0.0395 1.0000 Uiso . . . . . . 
H311 H 0.0318 -0.1849 0.1328 0.0329 1.0000 Uiso . . . . . . 
H321 H 0.0146 -0.2390 0.2555 0.0382 1.0000 Uiso . . . . . . 
H331 H -0.0637 -0.1989 0.3636 0.0376 1.0000 Uiso . . . . . . 
H341 H -0.1296 -0.1067 0.3423 0.0395 1.0000 Uiso . . . . . . 
H371 H -0.2150 -0.0320 0.3138 0.0565 1.0000 Uiso . . . . . . 
H372 H -0.2519 0.0204 0.2424 0.0565 1.0000 Uiso . . . . . . 
H381 H -0.3916 -0.0470 0.2157 0.0901 1.0000 Uiso . . . . . . 
H382 H -0.3117 -0.0947 0.1983 0.0901 1.0000 Uiso . . . . . . 
H383 H -0.3482 -0.0428 0.1277 0.0901 1.0000 Uiso . . . . . . 
H601 H 0.4788 -0.0481 0.6783 0.0643 1.0000 Uiso . . . . . . 
H602 H 0.4231 0.0131 0.6572 0.0643 1.0000 Uiso . . . . . . 
H603 H 0.5144 -0.0051 0.6111 0.0643 1.0000 Uiso . . . . . . 
H801 H 0.1735 -0.1956 0.4144 0.0470 1.0000 Uiso . . . . . . 
H802 H 0.1963 -0.1919 0.5238 0.0470 1.0000 Uiso . . . . . . 
H803 H 0.2917 -0.2100 0.4824 0.0470 1.0000 Uiso . . . . . . 
H1101 H -0.1127 0.1171 0.3406 0.0683 1.0000 Uiso . . . . . . 
H1102 H -0.0368 0.0614 0.3694 0.0683 1.0000 Uiso . . . . . . 
H1111 H -0.0122 0.1211 0.4930 0.1688 1.0000 Uiso . . . . . . 
H1112 H 0.0223 0.1712 0.4364 0.1688 1.0000 Uiso . . . . . . 
H1113 H 0.0974 0.1160 0.4650 0.1688 1.0000 Uiso . . . . . . 
H1201 H -0.1401 0.2162 -0.0534 0.0544 1.0000 Uiso . . . . . . 
H1202 H -0.2306 0.1826 -0.1335 0.0544 1.0000 Uiso . . . . . . 
H1211 H -0.3162 0.2524 -0.0653 0.0618 1.0000 Uiso . . . . . . 
H1212 H -0.2653 0.2236 0.0338 0.0618 1.0000 Uiso . . . . . . 
H1213 H -0.3549 0.1904 -0.0454 0.0618 1.0000 Uiso . . . . . . 
H2101 H 0.2311 0.1913 0.2859 0.0366 1.0000 Uiso . . . . . . 
H2102 H 0.2830 0.2058 0.2040 0.0366 1.0000 Uiso . . . . . . 
H2111 H 0.4222 0.1999 0.3469 0.0494 1.0000 Uiso . . . . . . 
H2112 H 0.3863 0.1363 0.3605 0.0494 1.0000 Uiso . . . . . . 
H2113 H 0.4376 0.1506 0.2795 0.0494 1.0000 Uiso . . . . . . 
loop_
_atom_site_aniso_label
_atom_site_aniso_U_11
_atom_site_aniso_U_22
_atom_site_aniso_U_33
_atom_site_aniso_U_23
_atom_site_aniso_U_13
_atom_site_aniso_U_12
Mn1 0.0174(3) 0.0143(2) 0.0230(3) -0.0019(2) 0.0072(2) -0.0002(2) 
Mn2 0.0165(3) 0.0146(2) 0.0212(3) 0.0011(2) 0.0067(2) -0.0001(2) 
Mn3 0.0170(2) 0.0137(2) 0.0171(2) -0.0005(2) 0.00539(19) -0.0008(2) 
O1 0.0213(14) 0.0220(13) 0.0412(17) -0.0081(12) 0.0121(13) -0.0011(11) 
O2 0.0178(13) 0.0234(13) 0.0271(14) 0.0051(11) 0.0098(11) -0.0004(10) 
O3 0.0233(13) 0.0164(12) 0.0176(12) -0.0012(10) 0.0037(10) -0.0014(10) 
O11 0.0326(16) 0.0335(16) 0.0252(15) -0.0002(13) 0.0072(13) 0.0055(13) 
O12 0.0296(15) 0.0217(14) 0.0276(15) -0.0009(11) 0.0036(12) -0.0010(11) 
O21 0.0283(14) 0.0227(14) 0.0232(14) -0.0007(11) 0.0054(11) -0.0072(11) 
O30 0.0231(13) 0.0251(14) 0.0221(13) 0.0016(11) 0.0014(11) 0.0001(11) 
O31 0.0354(16) 0.0224(14) 0.0243(15) 0.0031(11) 0.0030(12) -0.0033(12) 
O123 0.0180(12) 0.0147(11) 0.0230(13) 0.0009(10) 0.0082(10) -0.0003(10) 
O162 0.0259(14) 0.0154(12) 0.0283(14) 0.0020(10) 0.0139(12) 0.0009(10) 
O263 0.0155(11) 0.0165(12) 0.0202(12) -0.0019(10) 0.0040(10) -0.0032(9) 
O361 0.0191(13) 0.0166(12) 0.0302(15) -0.0001(11) 0.0088(11) -0.0012(10) 
C3 0.0207(17) 0.0261(19) 0.0225(18) 0.0034(15) 0.0054(14) -0.0011(15) 
C4 0.0254(19) 0.0210(18) 0.0206(18) 0.0048(14) 0.0028(15) -0.0008(15) 
C5 0.041(2) 0.027(2) 0.026(2) 0.0055(17) -0.0028(18) -0.0045(18) 
C6 0.046(3) 0.037(3) 0.028(2) 0.0028(19) -0.004(2) -0.004(2) 
C7 0.039(3) 0.039(3) 0.028(2) 0.0145(19) 0.0006(19) 0.001(2) 
C8 0.031(2) 0.027(2) 0.034(2) 0.0080(18) 0.0103(18) 0.0008(17) 
C9 0.0251(19) 0.0256(19) 0.0242(19) 0.0021(16) 0.0054(16) -0.0025(16) 
C10 0.0252(19) 0.0214(18) 0.0250(19) -0.0024(15) 0.0063(16) 0.0002(15) 
C11 0.031(2) 0.029(2) 0.033(2) 0.0010(18) 0.0140(18) 0.0051(17) 
C12 0.046(3) 0.038(2) 0.027(2) -0.0024(19) 0.018(2) 0.007(2) 
C13 0.058(3) 0.036(2) 0.031(2) -0.014(2) 0.017(2) -0.004(2) 
C14 0.044(3) 0.031(2) 0.032(2) -0.0118(18) 0.015(2) -0.0093(19) 
C15 0.0266(19) 0.0195(17) 0.027(2) -0.0041(15) 0.0080(16) -0.0017(15) 
C16 0.0241(19) 0.0203(18) 0.029(2) 0.0003(15) 0.0084(16) -0.0020(15) 
C17 0.054(3) 0.020(2) 0.053(3) -0.0078(19) 0.034(3) -0.0099(19) 
C18 0.096(5) 0.031(3) 0.067(4) 0.014(3) 0.042(4) -0.004(3) 
C20 0.0210(17) 0.0244(18) 0.0192(17) -0.0020(14) 0.0071(14) -0.0010(14) 
C21 0.0250(19) 0.0232(18) 0.027(2) -0.0006(15) 0.0112(16) -0.0038(15) 
C22 0.0232(18) 0.029(2) 0.033(2) -0.0035(17) 0.0112(16) -0.0095(16) 
C23 0.0187(18) 0.030(2) 0.041(2) -0.0030(18) 0.0093(17) -0.0035(16) 
C24 0.0211(19) 0.0225(19) 0.038(2) -0.0017(17) 0.0080(17) 0.0015(15) 
C25 0.0171(17) 0.0219(18) 0.0246(19) -0.0013(14) 0.0080(14) -0.0003(14) 
C26 0.0189(17) 0.0227(18) 0.0186(17) 0.0015(14) 0.0040(14) 0.0017(14) 
C27 0.0191(17) 0.0176(17) 0.031(2) -0.0026(15) 0.0068(15) 0.0029(14) 
C28 0.031(2) 0.025(2) 0.038(2) 0.0052(18) 0.0012(19) 0.0051(17) 
C30 0.0212(17) 0.0166(16) 0.0203(17) 0.0014(14) 0.0053(14) -0.0050(14) 
C31 0.034(2) 0.0192(18) 0.027(2) 0.0029(15) 0.0102(17) 0.0013(16) 
C32 0.037(2) 0.0189(18) 0.033(2) 0.0063(16) 0.0100(19) 0.0013(16) 
C33 0.038(2) 0.025(2) 0.032(2) 0.0080(17) 0.0133(19) 0.0012(17) 
C34 0.034(2) 0.030(2) 0.034(2) 0.0042(18) 0.0167(18) -0.0018(18) 
C35 0.0203(18) 0.0201(17) 0.028(2) 0.0040(15) 0.0087(15) 0.0013(14) 
C36 0.0226(19) 0.0241(19) 0.032(2) 0.0021(16) 0.0120(16) -0.0016(15) 
C37 0.042(3) 0.030(2) 0.067(3) 0.019(2) 0.037(3) 0.010(2) 
C38 0.043(3) 0.057(4) 0.124(7) -0.013(4) 0.033(4) 0.003(3) 
C60 0.076(4) 0.054(3) 0.029(3) 0.006(2) -0.016(3) -0.009(3) 
C80 0.040(3) 0.030(2) 0.043(3) 0.014(2) 0.009(2) 0.0012(19) 
C110 0.070(4) 0.061(4) 0.036(3) 0.014(3) 0.026(3) 0.013(3) 
C111 0.094(8) 0.45(3) 0.048(5) -0.029(10) 0.027(5) -0.006(13) 
C120 0.041(3) 0.047(3) 0.040(3) 0.007(2) 0.008(2) 0.005(2) 
C121 0.047(3) 0.064(4) 0.042(3) 0.006(3) 0.009(2) 0.029(3) 
C210 0.035(2) 0.0238(19) 0.029(2) -0.0049(16) 0.0082(18) -0.0077(17) 
C211 0.044(3) 0.044(3) 0.033(2) 0.001(2) -0.002(2) -0.017(2) 
N16 0.0184(15) 0.0190(15) 0.0209(15) 0.0013(12) 0.0055(12) 0.0016(11) 
N26 0.0185(14) 0.0140(13) 0.0203(15) -0.0012(11) 0.0051(12) -0.0013(11) 
N36 0.0200(14) 0.0144(14) 0.0216(15) 0.0014(12) 0.0060(12) 0.0010(11) 

_refine_ls_extinction_method 
    'None'
_oxford_refine_ls_scale 0.24015(17) 
loop_
 _geom_bond_atom_site_label_1
 _geom_bond_site_symmetry_1
 _geom_bond_atom_site_label_2
 _geom_bond_site_symmetry_2
 _geom_bond_distance
 _geom_bond_publ_flag
Mn1 . Mn2 . 3.2476(8)    yes
Mn1 . Mn3 . 3.2647(8)    yes
Mn1 . O1 . 1.864(3)    yes
Mn1 . O11 . 2.237(3)    yes
Mn1 . O12 . 2.334(3)    yes
Mn1 . O123 . 1.891(3)    yes
Mn1 . O361 . 1.916(3)    yes
Mn1 . N16 . 2.004(3)    yes
Mn2 . O3 2_555 2.481(3)    yes
Mn2 . Mn3 . 3.2822(8)    yes
Mn2 . O2 . 1.868(3)    yes
Mn2 . O21 . 2.196(3)    yes
Mn2 . O123 . 1.887(3)    yes
Mn2 . O162 . 1.919(3)    yes
Mn2 . N26 . 2.000(3)    yes
Mn3 . O263 2_555 2.434(3)    yes
Mn3 . O3 . 1.924(3)    yes
Mn3 . O30 . 2.130(3)    yes
Mn3 . O123 . 1.878(2)    yes
Mn3 . O263 . 1.951(3)    yes
Mn3 . N36 . 2.004(3)    yes
O1 . C10 . 1.340(5)    yes
O2 . C20 . 1.336(5)    yes
O3 . C30 . 1.352(4)    yes
O11 . C110 . 1.429(6)    yes
O11 . H11 . 0.885(10)    no
O12 . C120 . 1.445(6)    yes
O12 . H12 . 0.887(10)    no
O21 . C210 . 1.429(5)    yes
O21 . H21 . 0.885(10)    no
O30 . C3 . 1.253(5)    yes
O31 . C3 . 1.264(5)    yes
O162 . N16 . 1.378(4)    yes
O263 . N26 . 1.392(4)    yes
O361 . N36 . 1.367(4)    yes
C3 . C4 . 1.510(5)    yes
C4 . C5 . 1.388(6)    yes
C4 . C9 . 1.388(5)    yes
C5 . C6 . 1.396(6)    yes
C5 . H51 . 0.957    no
C6 . C7 . 1.389(7)    yes
C6 . C60 . 1.505(7)    yes
C7 . C8 . 1.389(7)    yes
C7 . H71 . 0.966    no
C8 . C9 . 1.392(6)    yes
C8 . C80 . 1.502(6)    yes
C9 . H91 . 0.954    no
C10 . C11 . 1.399(6)    yes
C10 . C15 . 1.412(6)    yes
C11 . C12 . 1.380(6)    yes
C11 . H111 . 0.960    no
C12 . C13 . 1.382(7)    yes
C12 . H121 . 0.958    no
C13 . C14 . 1.369(7)    yes
C13 . H131 . 0.966    no
C14 . C15 . 1.411(6)    yes
C14 . H141 . 0.965    no
C15 . C16 . 1.462(6)    yes
C16 . C17 . 1.499(6)    yes
C16 . N16 . 1.303(5)    yes
C17 . C18 . 1.522(8)    yes
C17 . H171 . 1.002    no
C17 . H172 . 0.994    no
C18 . H181 . 0.988    no
C18 . H182 . 0.983    no
C18 . H183 . 0.978    no
C20 . C21 . 1.402(5)    yes
C20 . C25 . 1.415(5)    yes
C21 . C22 . 1.374(6)    yes
C21 . H211 . 0.967    no
C22 . C23 . 1.392(6)    yes
C22 . H221 . 0.965    no
C23 . C24 . 1.379(6)    yes
C23 . H231 . 0.958    no
C24 . C25 . 1.409(5)    yes
C24 . H241 . 0.957    no
C25 . C26 . 1.472(5)    yes
C26 . C27 . 1.502(5)    yes
C26 . N26 . 1.300(5)    yes
C27 . C28 . 1.529(6)    yes
C27 . H271 . 1.002    no
C27 . H272 . 0.994    no
C28 . H281 . 0.973    no
C28 . H282 . 0.992    no
C28 . H283 . 0.986    no
C30 . C31 . 1.403(5)    yes
C30 . C35 . 1.411(5)    yes
C31 . C32 . 1.379(6)    yes
C31 . H311 . 0.960    no
C32 . C33 . 1.388(6)    yes
C32 . H321 . 0.959    no
C33 . C34 . 1.374(6)    yes
C33 . H331 . 0.963    no
C34 . C35 . 1.408(6)    yes
C34 . H341 . 0.963    no
C35 . C36 . 1.463(5)    yes
C36 . C37 . 1.511(6)    yes
C36 . N36 . 1.293(5)    yes
C37 . C38 . 1.469(9)    yes
C37 . H371 . 1.005    no
C37 . H372 . 1.001    no
C38 . H381 . 0.968    no
C38 . H382 . 0.987    no
C38 . H383 . 0.998    no
C60 . H601 . 0.990    no
C60 . H602 . 0.996    no
C60 . H603 . 0.978    no
C80 . H801 . 0.980    no
C80 . H802 . 0.983    no
C80 . H803 . 0.987    no
C110 . C111 . 1.374(13)    yes
C110 . H1101 . 0.989    no
C110 . H1102 . 1.010    no
C111 . H1111 . 0.953    no
C111 . H1112 . 1.077    no
C111 . H1113 . 0.981    no
C120 . C121 . 1.507(8)    yes
C120 . H1201 . 0.999    no
C120 . H1202 . 1.003    no
C121 . H1211 . 0.984    no
C121 . H1212 . 0.988    no
C121 . H1213 . 0.995    no
C210 . C211 . 1.505(7)    yes
C210 . H2101 . 0.994    no
C210 . H2102 . 0.996    no
C211 . H2111 . 0.981    no
C211 . H2112 . 0.985    no
C211 . H2113 . 0.985    no
loop_
 _geom_angle_atom_site_label_1
 _geom_angle_site_symmetry_1
 _geom_angle_atom_site_label_2
 _geom_angle_site_symmetry_2
 _geom_angle_atom_site_label_3
 _geom_angle_site_symmetry_3
 _geom_angle
 _geom_angle_publ_flag
Mn2 . Mn1 . Mn3 . 60.528(17)    yes
Mn2 . Mn1 . O1 . 147.32(9)    yes
Mn3 . Mn1 . O1 . 152.03(9)    yes
Mn2 . Mn1 . O11 . 96.64(8)    yes
Mn3 . Mn1 . O11 . 87.94(8)    yes
O1 . Mn1 . O11 . 89.69(13)    yes
Mn2 . Mn1 . O12 . 79.32(8)    yes
Mn3 . Mn1 . O12 . 94.07(8)    yes
O1 . Mn1 . O12 . 91.26(13)    yes
O11 . Mn1 . O12 . 173.80(12)    yes
Mn2 . Mn1 . O123 . 30.70(8)    yes
Mn3 . Mn1 . O123 . 29.87(8)    yes
O1 . Mn1 . O123 . 177.84(13)    yes
O11 . Mn1 . O123 . 91.55(12)    yes
O12 . Mn1 . O123 . 87.32(11)    yes
Mn2 . Mn1 . O361 . 120.96(8)    yes
Mn3 . Mn1 . O361 . 61.44(8)    yes
O1 . Mn1 . O361 . 90.77(12)    yes
O11 . Mn1 . O361 . 91.28(12)    yes
O12 . Mn1 . O361 . 94.83(11)    yes
Mn2 . Mn1 . N16 . 58.31(9)    yes
Mn3 . Mn1 . N16 . 118.28(9)    yes
O1 . Mn1 . N16 . 89.62(13)    yes
O11 . Mn1 . N16 . 91.34(13)    yes
O12 . Mn1 . N16 . 82.53(12)    yes
O123 . Mn1 . O361 . 90.98(11)    yes
O123 . Mn1 . N16 . 88.57(12)    yes
O361 . Mn1 . N16 . 177.35(13)    yes
O3 2_555 Mn2 . Mn1 . 94.21(7)    yes
O3 2_555 Mn2 . Mn3 . 78.12(6)    yes
Mn1 . Mn2 . Mn3 . 59.994(16)    yes
O3 2_555 Mn2 . O2 . 92.93(11)    yes
Mn1 . Mn2 . O2 . 153.18(9)    yes
Mn3 . Mn2 . O2 . 146.82(9)    yes
O3 2_555 Mn2 . O21 . 168.08(10)    yes
Mn1 . Mn2 . O21 . 88.81(8)    yes
Mn3 . Mn2 . O21 . 93.52(7)    yes
O2 . Mn2 . O21 . 89.49(12)    yes
O3 2_555 Mn2 . O123 . 86.41(10)    yes
Mn1 . Mn2 . O123 . 30.76(8)    yes
Mn3 . Mn2 . O123 . 29.27(8)    yes
O2 . Mn2 . O123 . 176.04(12)    yes
O21 . Mn2 . O123 . 90.37(11)    yes
O3 2_555 Mn2 . O162 . 98.92(11)    yes
Mn1 . Mn2 . O162 . 61.56(8)    yes
Mn3 . Mn2 . O162 . 121.00(8)    yes
O2 . Mn2 . O162 . 91.79(12)    yes
O21 . Mn2 . O162 . 92.66(12)    yes
O3 2_555 Mn2 . N26 . 79.11(11)    yes
Mn1 . Mn2 . N26 . 118.10(9)    yes
Mn3 . Mn2 . N26 . 58.41(9)    yes
O2 . Mn2 . N26 . 88.64(12)    yes
O21 . Mn2 . N26 . 89.29(12)    yes
O123 . Mn2 . O162 . 92.16(11)    yes
O123 . Mn2 . N26 . 87.41(12)    yes
O162 . Mn2 . N26 . 178.00(13)    yes
O263 2_555 Mn3 . Mn1 . 81.67(6)    yes
O263 2_555 Mn3 . Mn2 . 87.34(6)    yes
Mn1 . Mn3 . Mn2 . 59.479(17)    yes
O263 2_555 Mn3 . O3 . 83.89(10)    yes
Mn1 . Mn3 . O3 . 144.18(8)    yes
Mn2 . Mn3 . O3 . 151.97(8)    yes
O263 2_555 Mn3 . O30 . 173.31(10)    yes
Mn1 . Mn3 . O30 . 104.30(8)    yes
Mn2 . Mn3 . O30 . 98.26(8)    yes
O3 . Mn3 . O30 . 89.46(11)    yes
O263 2_555 Mn3 . O123 . 84.76(10)    yes
Mn1 . Mn3 . O123 . 30.09(8)    yes
Mn2 . Mn3 . O123 . 29.42(8)    yes
O3 . Mn3 . O123 . 168.33(12)    yes
O30 . Mn3 . O123 . 101.92(11)    yes
O263 2_555 Mn3 . O263 . 84.80(10)    yes
Mn1 . Mn3 . O263 . 118.81(8)    yes
Mn2 . Mn3 . O263 . 60.51(7)    yes
O3 . Mn3 . O263 . 92.14(11)    yes
O30 . Mn3 . O263 . 94.74(11)    yes
O263 2_555 Mn3 . N36 . 87.14(11)    yes
Mn1 . Mn3 . N36 . 58.20(9)    yes
Mn2 . Mn3 . N36 . 117.59(9)    yes
O3 . Mn3 . N36 . 88.56(12)    yes
O30 . Mn3 . N36 . 93.44(12)    yes
O123 . Mn3 . O263 . 89.53(11)    yes
O123 . Mn3 . N36 . 88.17(12)    yes
O263 . Mn3 . N36 . 171.79(12)    yes
Mn1 . O1 . C10 . 122.3(3)    yes
Mn2 . O2 . C20 . 120.1(2)    yes
Mn2 2_555 O3 . Mn3 . 117.86(12)    yes
Mn2 2_555 O3 . C30 . 114.2(2)    yes
Mn3 . O3 . C30 . 119.3(2)    yes
Mn1 . O11 . C110 . 123.8(3)    yes
Mn1 . O11 . H11 . 115(4)    no
C110 . O11 . H11 . 108(4)    no
Mn1 . O12 . C120 . 127.6(3)    yes
Mn1 . O12 . H12 . 106(4)    no
C120 . O12 . H12 . 110(4)    no
Mn2 . O21 . C210 . 129.7(3)    yes
Mn2 . O21 . H21 . 113(3)    no
C210 . O21 . H21 . 110(3)    no
Mn3 . O30 . C3 . 141.2(3)    yes
Mn1 . O123 . Mn2 . 118.54(13)    yes
Mn1 . O123 . Mn3 . 120.04(14)    yes
Mn2 . O123 . Mn3 . 121.31(14)    yes
Mn2 . O162 . N16 . 114.0(2)    yes
Mn3 2_555 O263 . Mn3 . 95.20(10)    yes
Mn3 2_555 O263 . N26 . 111.05(19)    yes
Mn3 . O263 . N26 . 113.32(19)    yes
Mn1 . O361 . N36 . 115.3(2)    yes
O31 . C3 . O30 . 125.7(4)    yes
O31 . C3 . C4 . 116.6(3)    yes
O30 . C3 . C4 . 117.7(4)    yes
C3 . C4 . C5 . 119.6(4)    yes
C3 . C4 . C9 . 120.4(4)    yes
C5 . C4 . C9 . 120.0(4)    yes
C4 . C5 . C6 . 120.6(4)    yes
C4 . C5 . H51 . 119.6    no
C6 . C5 . H51 . 119.8    no
C5 . C6 . C7 . 118.1(4)    yes
C5 . C6 . C60 . 120.8(5)    yes
C7 . C6 . C60 . 121.0(5)    yes
C6 . C7 . C8 . 122.3(4)    yes
C6 . C7 . H71 . 118.5    no
C8 . C7 . H71 . 119.2    no
C7 . C8 . C9 . 118.4(4)    yes
C7 . C8 . C80 . 120.8(4)    yes
C9 . C8 . C80 . 120.8(4)    yes
C8 . C9 . C4 . 120.6(4)    yes
C8 . C9 . H91 . 119.6    no
C4 . C9 . H91 . 119.8    no
O1 . C10 . C11 . 117.5(4)    yes
O1 . C10 . C15 . 122.6(4)    yes
C11 . C10 . C15 . 119.8(4)    yes
C10 . C11 . C12 . 120.8(4)    yes
C10 . C11 . H111 . 119.5    no
C12 . C11 . H111 . 119.7    no
C11 . C12 . C13 . 119.7(4)    yes
C11 . C12 . H121 . 119.6    no
C13 . C12 . H121 . 120.7    no
C12 . C13 . C14 . 120.3(4)    yes
C12 . C13 . H131 . 119.3    no
C14 . C13 . H131 . 120.3    no
C13 . C14 . C15 . 121.7(4)    yes
C13 . C14 . H141 . 119.5    no
C15 . C14 . H141 . 118.8    no
C10 . C15 . C14 . 117.4(4)    yes
C10 . C15 . C16 . 124.0(4)    yes
C14 . C15 . C16 . 118.6(4)    yes
C15 . C16 . C17 . 120.1(4)    yes
C15 . C16 . N16 . 118.7(3)    yes
C17 . C16 . N16 . 121.3(4)    yes
C16 . C17 . C18 . 112.1(4)    yes
C16 . C17 . H171 . 108.6    no
C18 . C17 . H171 . 109.1    no
C16 . C17 . H172 . 109.3    no
C18 . C17 . H172 . 109.4    no
H171 . C17 . H172 . 108.2    no
C17 . C18 . H181 . 110.0    no
C17 . C18 . H182 . 109.9    no
H181 . C18 . H182 . 108.6    no
C17 . C18 . H183 . 109.9    no
H181 . C18 . H183 . 109.0    no
H182 . C18 . H183 . 109.4    no
O2 . C20 . C21 . 118.1(3)    yes
O2 . C20 . C25 . 123.1(3)    yes
C21 . C20 . C25 . 118.8(4)    yes
C20 . C21 . C22 . 121.6(4)    yes
C20 . C21 . H211 . 118.9    no
C22 . C21 . H211 . 119.5    no
C21 . C22 . C23 . 120.5(4)    yes
C21 . C22 . H221 . 120.0    no
C23 . C22 . H221 . 119.5    no
C22 . C23 . C24 . 118.7(4)    yes
C22 . C23 . H231 . 120.6    no
C24 . C23 . H231 . 120.7    no
C23 . C24 . C25 . 122.5(4)    yes
C23 . C24 . H241 . 118.7    no
C25 . C24 . H241 . 118.8    no
C20 . C25 . C24 . 117.9(3)    yes
C20 . C25 . C26 . 122.9(3)    yes
C24 . C25 . C26 . 119.2(3)    yes
C25 . C26 . C27 . 120.7(3)    yes
C25 . C26 . N26 . 118.5(3)    yes
C27 . C26 . N26 . 120.7(3)    yes
C26 . C27 . C28 . 110.8(3)    yes
C26 . C27 . H271 . 109.3    no
C28 . C27 . H271 . 109.4    no
C26 . C27 . H272 . 109.5    no
C28 . C27 . H272 . 109.6    no
H271 . C27 . H272 . 108.2    no
C27 . C28 . H281 . 111.0    no
C27 . C28 . H282 . 109.5    no
H281 . C28 . H282 . 109.1    no
C27 . C28 . H283 . 109.6    no
H281 . C28 . H283 . 109.6    no
H282 . C28 . H283 . 108.0    no
O3 . C30 . C31 . 118.4(3)    yes
O3 . C30 . C35 . 122.7(3)    yes
C31 . C30 . C35 . 118.9(3)    yes
C30 . C31 . C32 . 121.4(4)    yes
C30 . C31 . H311 . 119.0    no
C32 . C31 . H311 . 119.6    no
C31 . C32 . C33 . 120.1(4)    yes
C31 . C32 . H321 . 119.3    no
C33 . C32 . H321 . 120.7    no
C32 . C33 . C34 . 119.3(4)    yes
C32 . C33 . H331 . 120.7    no
C34 . C33 . H331 . 120.0    no
C33 . C34 . C35 . 122.2(4)    yes
C33 . C34 . H341 . 118.7    no
C35 . C34 . H341 . 119.1    no
C30 . C35 . C34 . 118.1(4)    yes
C30 . C35 . C36 . 122.8(3)    yes
C34 . C35 . C36 . 119.0(4)    yes
C35 . C36 . C37 . 119.6(3)    yes
C35 . C36 . N36 . 120.4(3)    yes
C37 . C36 . N36 . 120.0(4)    yes
C36 . C37 . C38 . 110.8(5)    yes
C36 . C37 . H371 . 109.7    no
C38 . C37 . H371 . 109.1    no
C36 . C37 . H372 . 110.1    no
C38 . C37 . H372 . 109.8    no
H371 . C37 . H372 . 107.4    no
C37 . C38 . H381 . 111.9    no
C37 . C38 . H382 . 109.6    no
H381 . C38 . H382 . 109.9    no
C37 . C38 . H383 . 108.8    no
H381 . C38 . H383 . 109.0    no
H382 . C38 . H383 . 107.5    no
C6 . C60 . H601 . 110.4    no
C6 . C60 . H602 . 110.2    no
H601 . C60 . H602 . 107.4    no
C6 . C60 . H603 . 111.4    no
H601 . C60 . H603 . 108.9    no
H602 . C60 . H603 . 108.4    no
C8 . C80 . H801 . 110.2    no
C8 . C80 . H802 . 109.8    no
H801 . C80 . H802 . 109.2    no
C8 . C80 . H803 . 109.9    no
H801 . C80 . H803 . 109.0    no
H802 . C80 . H803 . 108.7    no
O11 . C110 . C111 . 113.8(8)    yes
O11 . C110 . H1101 . 109.5    no
C111 . C110 . H1101 . 110.9    no
O11 . C110 . H1102 . 109.1    no
C111 . C110 . H1102 . 105.3    no
H1101 . C110 . H1102 . 108.0    no
C110 . C111 . H1111 . 116.6    no
C110 . C111 . H1112 . 106.9    no
H1111 . C111 . H1112 . 103.9    no
C110 . C111 . H1113 . 114.1    no
H1111 . C111 . H1113 . 111.7    no
H1112 . C111 . H1113 . 101.9    no
O12 . C120 . C121 . 111.6(5)    yes
O12 . C120 . H1201 . 109.4    no
C121 . C120 . H1201 . 109.3    no
O12 . C120 . H1202 . 109.4    no
C121 . C120 . H1202 . 109.3    no
H1201 . C120 . H1202 . 107.7    no
C120 . C121 . H1211 . 111.7    no
C120 . C121 . H1212 . 110.6    no
H1211 . C121 . H1212 . 108.5    no
C120 . C121 . H1213 . 110.3    no
H1211 . C121 . H1213 . 108.0    no
H1212 . C121 . H1213 . 107.6    no
O21 . C210 . C211 . 110.5(4)    yes
O21 . C210 . H2101 . 109.7    no
C211 . C210 . H2101 . 109.6    no
O21 . C210 . H2102 . 108.8    no
C211 . C210 . H2102 . 109.5    no
H2101 . C210 . H2102 . 108.6    no
C210 . C211 . H2111 . 110.5    no
C210 . C211 . H2112 . 109.8    no
H2111 . C211 . H2112 . 109.0    no
C210 . C211 . H2113 . 109.9    no
H2111 . C211 . H2113 . 109.0    no
H2112 . C211 . H2113 . 108.6    no
O162 . N16 . Mn1 . 115.6(2)    yes
O162 . N16 . C16 . 116.8(3)    yes
Mn1 . N16 . C16 . 127.3(3)    yes
O263 . N26 . Mn2 . 114.8(2)    yes
O263 . N26 . C26 . 117.6(3)    yes
Mn2 . N26 . C26 . 127.5(3)    yes
O361 . N36 . Mn3 . 116.8(2)    yes
O361 . N36 . C36 . 117.6(3)    yes
Mn3 . N36 . C36 . 125.5(3)    yes
